# Supplementary material for: Design, synthesis and characterization of fused bithiazole- and dithiophene-based low bandgap thienylenevinylene copolymers
Source: Royal Society of Chemistry journal article supplement (doi:10.1039/d1py00773d), 2021-01-01
Supplement: d1py00773d1.pdf [file d1py00773d1.pdf]

# Supporting Information

## Design, Synthesis and Characterization of Fused Bithiazole- and Dithiophene-Based Low Bandgap Thienylenevinylene Copolymers

Dhananjaya Patra,<sup>‡1</sup> Marc Comí,<sup>‡1</sup> Xianhe Zhang,<sup>2</sup> Gururaj P. Kini,<sup>3</sup> Malsha Udayakantha,<sup>4</sup> Alex Kalin,<sup>4</sup> Sarbajit Banerjee,<sup>4</sup> Lei Fang,<sup>4</sup> Xugang Guo<sup>2</sup> and Mohammed Al-Hashimi<sup>1\*</sup>

<sup>1</sup> Department of Chemistry, Texas A&M University at Qatar, Education City, Doha, P.O. Box 23874, Qatar.

<sup>2</sup> Department of Materials Science and Engineering, Southern University of Science and Technology (SUSTech), No. 1088, Xueyuan Road, Shenzhen, Guangdong 518055, China

<sup>3</sup> Nano and Information Materials (NIMs) Laboratory, Department of Chemical Engineering, Konkuk University, 120, Neungdong-ro, Gwangjin-gu, Seoul 05029, Korea.

<sup>4</sup> Department of Chemistry, Texas A&M University, College Station, TX 77843-3012, United States

### Table of contents:

- Materials and Methods
- Experimental Procedures
- NMR Characterization
- Polymer Thermal Properties
- Fluorescence
- AFM
- Computational Calculations
- OTFT Analysis

## **Materials and Methods**

All commercially available solvents, reagents, and chemicals were used as received without further purification unless otherwise stated. Anhydrous solvent tetrahydrofuran (THF) was distilled from sodium under argon. Sodium sulfide hydrate, sodium, dibutyltin dichloride, selenium powder, tetrakis(triphenylphosphine)palladium (0), tetrabutylammonium fluoride solution 1.0 M in THF and N-bromosuccinimide were purchased from Sigma Aldrich. Unless otherwise stated, all operations and reactions were carried out under argon using standard Schlenk line techniques.  $^1\text{H}$  and  $^{13}\text{C}$  NMR spectra were recorded on a Bruker AV-400 (400 MHz), using the residual solvent resonance of  $\text{CDCl}_3$  or TMS as an internal reference and are given in ppm. Number-average ( $M_n$ ) and weight average ( $M_w$ ) were determined by Agilent Technologies 1200 series GPC running in chlorobenzene at 80 °C, using two PL mixed B columns in series, and calibrated against narrow polydispersity polystyrene standards. UV-vis spectra were recorded on a UV- 1601 Shimadzu Uv-vis spectrometer. Flash chromatography (FC) was performed on silica gel (Merck Kieselgel 60 F254 230-400 mesh) unless otherwise indicated. Thin Layer Chromatography (TLC) was performed on Merck aluminium-backed plates pre-coated with silica (0.2 mm, 60 F254). Microwave experiments were performed in a Biotage initiator V 2.3. Differential scanning calorimetry (DSC) analysis were recorded on Mettler in nitrogen at 10 °C  $\text{min}^{-1}$  of heating rate from 30 °C to 350 °C in two cycles heating-cooling, and thermogravimetric analysis (TGA) curves were collected on Mettler in nitrogen at 10 °C  $\text{min}^{-1}$  of heating rate from 30 °C to 600 °C. Cyclic voltammetry (CV) measurements of polymers films were performed under argon atmosphere using a CHI760E Voltammetry analyzer with 0.1 M tetra-n-butylammonium hexafluorophosphate in acetonitrile as the supporting electrolyte. A platinum disk working electrode, a platinum wire counter electrode, and a silver wire reference electrode were employed, and the ferrocene/ferrocenium ( $\text{Fc}/\text{Fc}^+$ ) was used as the internal reference for all measurements. The scanning rate was 100 mV/s. Polymer films were drop-casted from chloroform solutions on a Pt working electrode (2 mm in diameter).

## Device Fabrication

Borosilicate glass was used as substrate on which source and drain electrodes (3 nm Cr and 30 nm Au) were patterned by standard photolithography process. The glass with pattern were cleaned by sonicated in acetone and isopropanol for 10 min. Then substrates were transferred into glove box filled with N<sub>2</sub> after UV-ozone (30 min) and plasma (15 min) treatment. All the semiconductors were solved in dichlorobenzene/chlorobenzene/chloroform with concentration of 5 mg/ml. The solution was spin-coated on the substrate with speed of 3000 rpm for 1 min followed by annealing at different temperature for 10 min then cooled to room temperature.

Then diluted CYTOP solution (CTL-809M: CT-SOLV180 = 2:1 volume ratio, Asahi Glass Co., Ltd.) was spin-coated with speed 1500 rpm for 1 min as dielectric layer followed by annealing at 100 °C for 20 min. Eventually, 50 nm Al was evaporated on the top of substrate as gate electrodes.

The maximum values were extracted from saturated region at optimal annealing temperature based on the equation:  $I_{SD} = \mu_{sat} C_i (W/2L) (V_G - V_T)^2$ , where W is the width of channel, L is the length of channel.  $I_{DS}$  is the source–drain saturation current after gate leakage current correction,  $C_i$  is the capacitance per unit area of CYTOP dielectric layer (4.4 nF cm<sup>-2</sup>),  $\mu_{sat}$  is the mobility,  $V_G$  is the gate voltage, and  $V_T$  is the threshold voltage.  $\mu_{sat}$  is extracted using  $\mu_{sat} = 2L(\partial |I_{SD}|^{1/2} / \partial V_G) / (C_i W)$ , where  $\Delta = \partial |I_{SD}|^{1/2} / \partial V_G$  is the slope of the square root plot of  $I_{SD}$  versus  $V_G$ .

## Experimental Procedures

### General Procedure for the Synthesis of TV-Copolymers P1-P4.

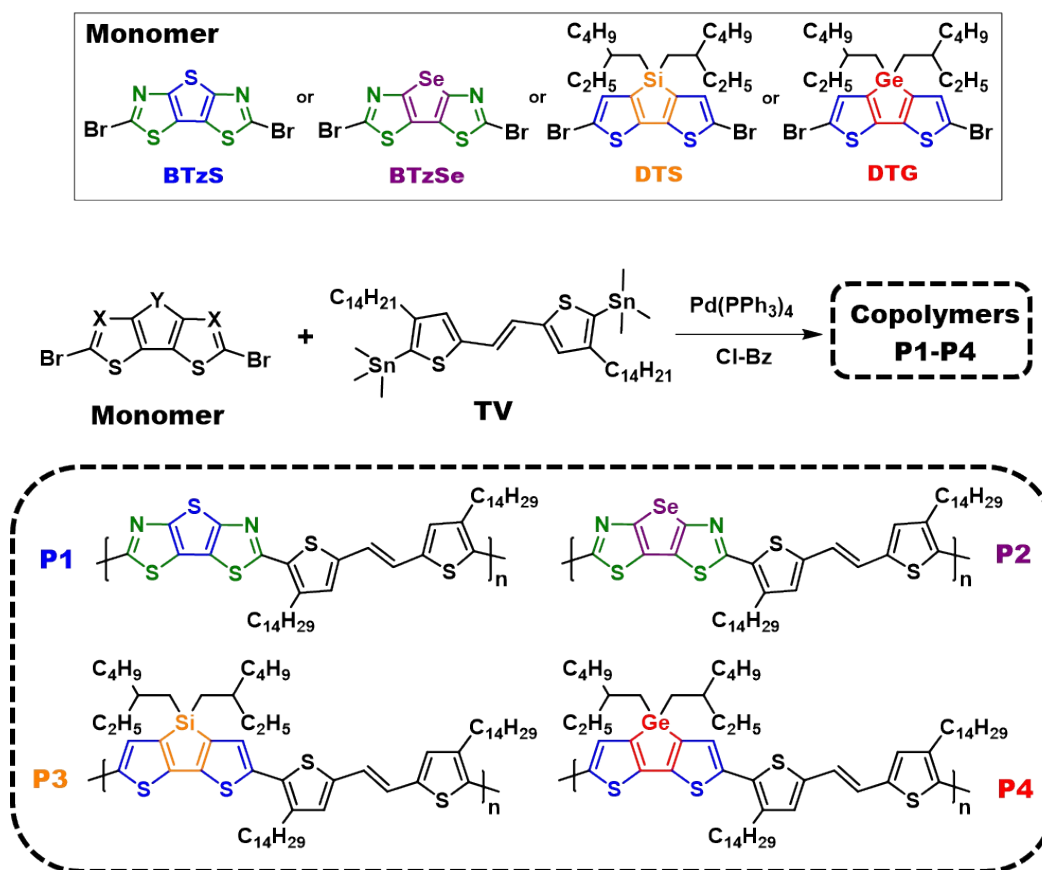

In a microwave vial equimolar amounts of ((E)-1,2-bis(4-tetradecyl-5-(trimethylstannyl)thiophen-2-yl)ethene (TV) (0.20 mmol) and 2,6-dibromothieno[2,3-d:5,4-d']bis(thiazole) or 2,6-dibromoselenopheno[2,3-d:5,4-d']bis(thiazole) or 2,6-dibromo-4,4-bis(2-ethylhexyl)-4H-silolo[3,2-b:4,5-b']dithiophene or 2,6-dibromo-4,4-bis(2-ethylhexyl)-4H-germolo[3,2-b:4,5-b']dithiophene were dissolved in anhydrous chlorobenzene (0.5 mL) followed by addition of tetrakis(triphenylphosphine)palladium(0) (2 mol%, 5.02 mg), the resultant mixture was degassed for 30 min with argon and securely sealed. The glass vial was placed into a microwave reactor and heated at 140 °C for 2 min, 160 °C for 2 min, and followed by 180 °C for 30 min. After being cooled to room temperature, the reaction mixture was precipitated into a mixture of methanol (200 mL) and concentrated HCl (2 mL) and stirred for 1 h at RT. The precipitate was filtered and extracted (Soxhlet) with methanol, acetone, n-hexane, chloroform. The remaining polymer was

dissolved in chlorobenzene and precipitated into methanol, filtered and dried under vacuum to achieve the desired polymers as a dark purple solid. The  $^1\text{H}$  NMR spectrum for all polymers exhibited considerable broadening of the aromatic and alkenyl hydrogen peaks and only alkyl sidechain protons were observable. We attribute this to the aggregation effects.

**P1:** Yield 101 mg,  $^1\text{H}$  NMR (400 MHz,  $\text{CDCl}_3$ )  $\delta$  7.12 (2H), 6.92 (2H), 1.53 (4H), 1.10-1.50 (48H), 0.87 (6H); GPC:  $M_n = 24,200$  g/mol,  $\mathcal{D} = 2.0$ ; UV-Vis:  $\lambda_{max} = 546$  nm (dilute chlorobenzene solution).

**P2:** Yield 100 mg,  $^1\text{H}$  NMR (400 MHz,  $\text{CDCl}_3$ )  $\delta$  7.13 (2H), 6.92 (2H), 1.54 (4H), 1.10-1.50 (48H), 0.86 (6H); GPC:  $M_n = 21,100$  g/mol,  $\mathcal{D} = 1.9$ ; UV-Vis:  $\lambda_{max} = 557$  nm (dilute chlorobenzene solution).

**P3:** Yield 123 mg,  $^1\text{H}$  NMR (400 MHz,  $\text{CDCl}_3$ )  $\delta$  7.15 (4H), 6.95 (2H), 2.67 (4H), 1.66 (4H), 1.10-1.60 (72H), 0.90 (12H); GPC:  $M_n = 36,400$ g/mol,  $\mathcal{D} = 2.1$ ; UV-Vis:  $\lambda_{max} = 560$  nm (dilute chlorobenzene solution).

**P4:** Yield 119 mg,  $^1\text{H}$  NMR (400 MHz,  $\text{CDCl}_3$ )  $\delta$  7.13 (4H), 6.93 (2H), 2.65 (4H), 1.64 (4H), 1.10-1.60 (72H), 0.86 (12H); GPC:  $M_n = 37,600$  g/mol,  $\mathcal{D} = 2.1$ ; UV-Vis:  $\lambda_{max} = 566$  nm (dilute chlorobenzene solution).

## NMR characterization

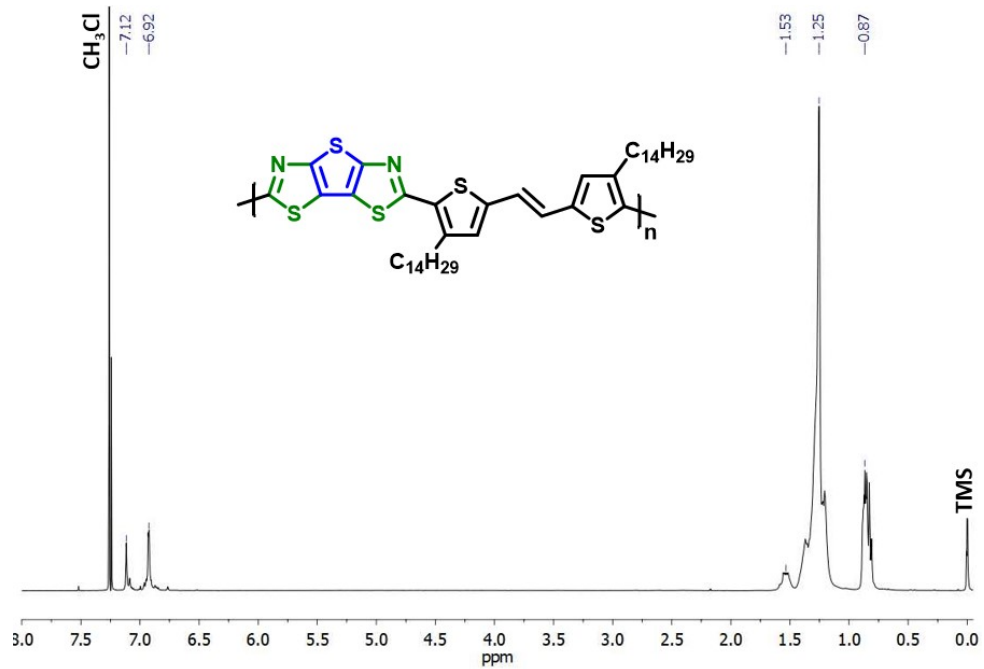

Figure S1.  $^1\text{H}$  NMR spectrum of P1.

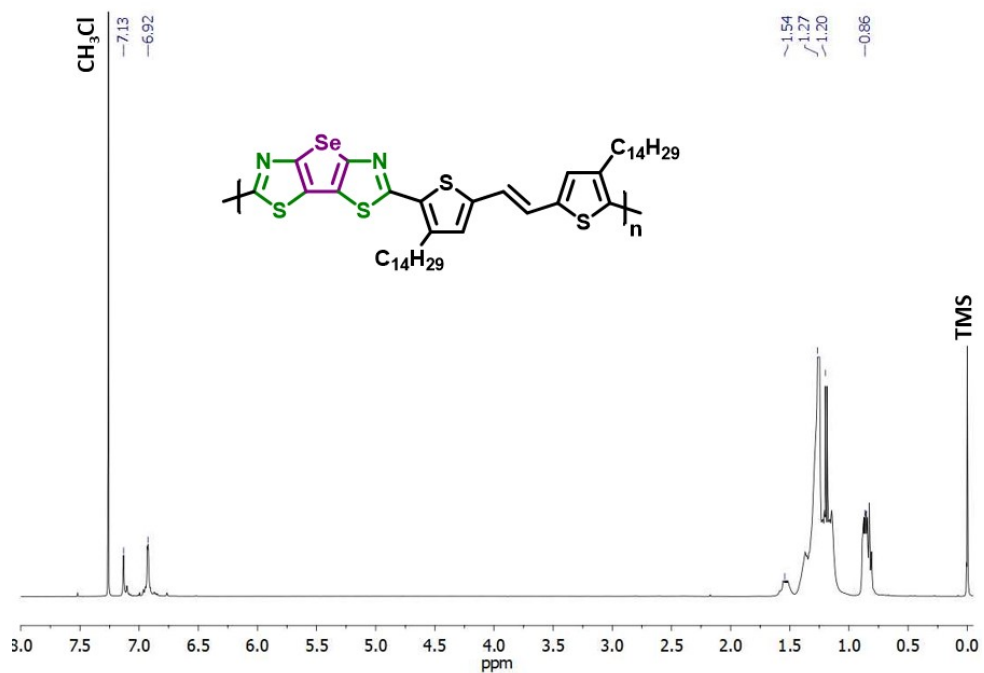

Figure S2.  $^1\text{H}$  NMR spectrum of P2.

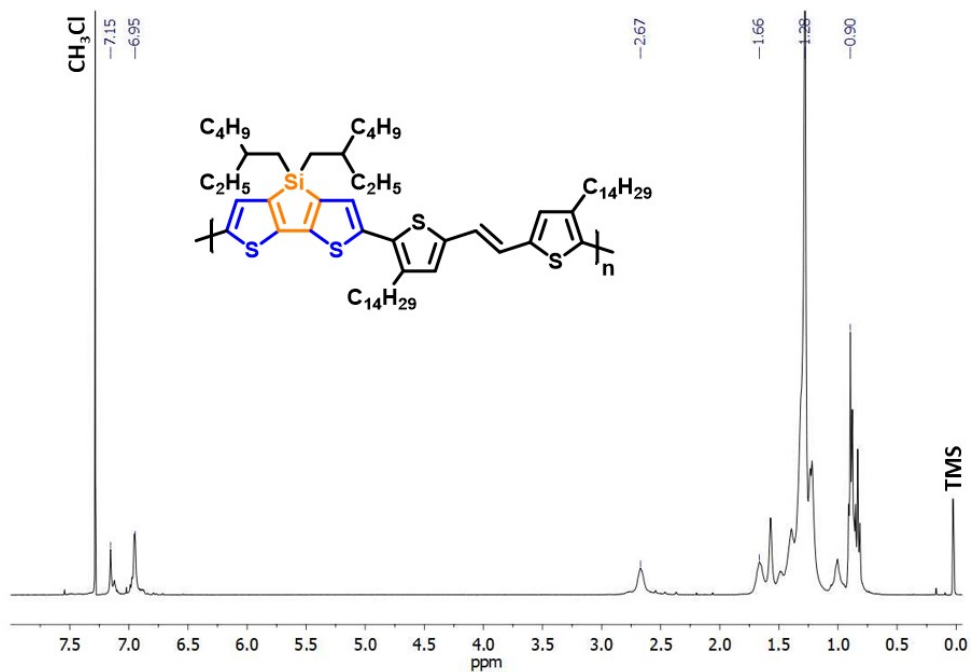

Figure S3.  $^1\text{H}$  NMR spectrum of P3.

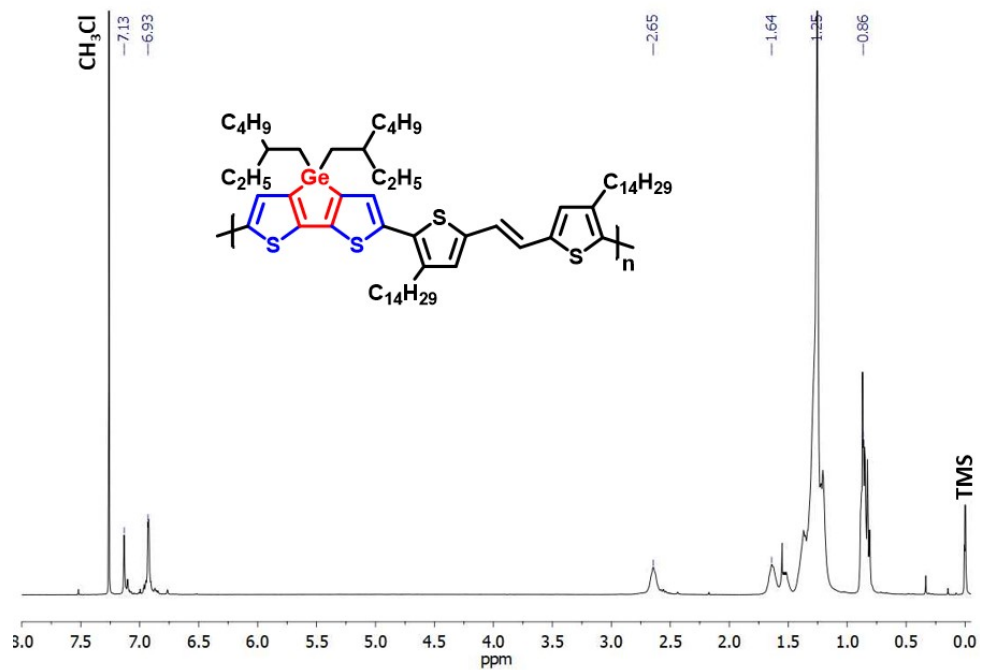

Figure S4.  $^1\text{H}$  NMR spectrum of **P4**.

## Polymer Thermal Properties

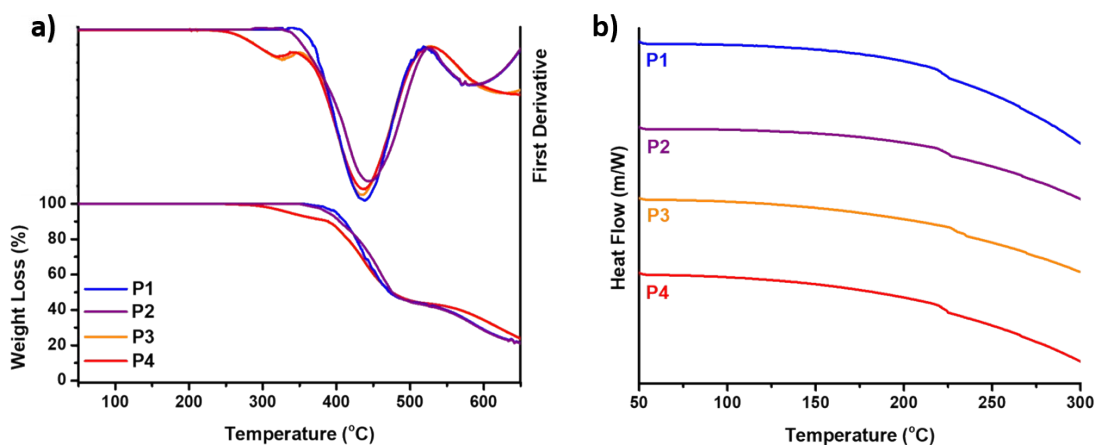

Figure S5. (a) TGA thermograms of copolymers **P1-4** under nitrogen flow at  $10\text{ }^\circ\text{C min}^{-1}$  of heating rate from  $30\text{ }^\circ\text{C}$  to  $600\text{ }^\circ\text{C}$ . (b) DSC thermograms of second heating scan for copolymers **P1-4**,  $30\text{ }^\circ\text{C}$  to  $350\text{ }^\circ\text{C}$ , in heating-cooling-heating scans with a ramp rate of  $10\text{ }^\circ\text{C min}^{-1}$  under  $\text{N}_2$  as the purge gas.

## Fluorescence

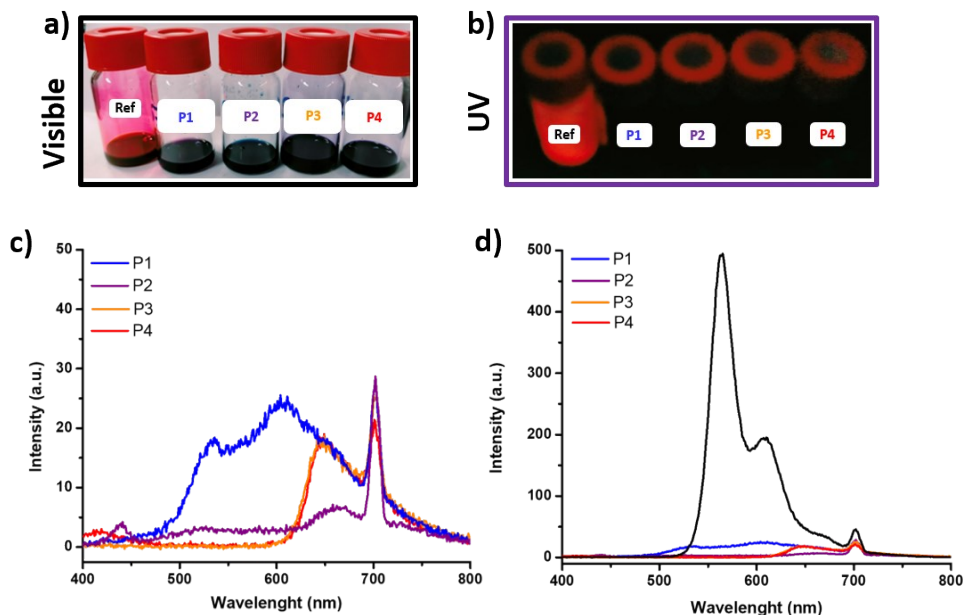

Figure S6. Photograph of **P1-P4** and fluorescence **reference** in solution under a) visible and b) UV light. Emission spectra of c) copolymers **P1-P4** in solution and d) comparison of intensity between fluorescence **reference** and copolymers **P1-P4** in solution upon excitation at  $350\text{ nm}$ .



## AFM

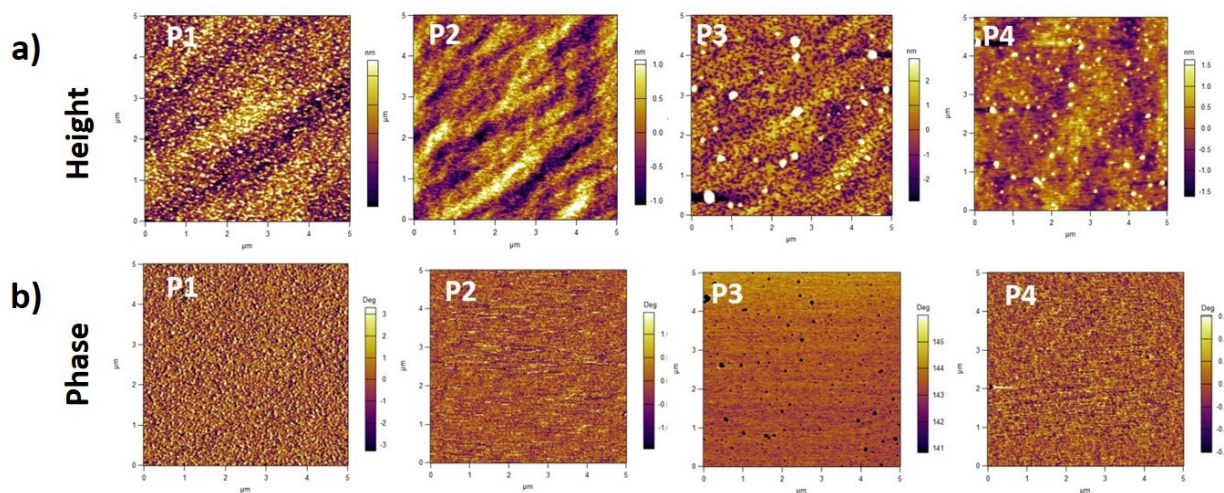

**Figure S7.** Tapping-mode AFM (a) height image and (b) phase image of as-cast films of copolymers **P1-4** and root-mean-square (RMS) roughness values **P1** = 1.16, **P2** = 0.53, **P3** = 0.80 and **P4** = 0.46 nm.

## Computational Calculations

| Polymer   | $\theta_1$ (°) | $\theta_2$ (°) | $\theta_3$ (°) | HOMO (eV) | LUMO (eV) |
|-----------|----------------|----------------|----------------|-----------|-----------|
| <b>P1</b> | 0.01           | 0.01           | 0.02           | -4.90     | -2.67     |
| <b>P2</b> | 0.02           | 0.01           | 0.01           | -4.88     | -2.65     |
| <b>P3</b> | 3.97           | 5.69           | 5.4            | -4.92     | -4.02     |
| <b>P4</b> | 3.37           | 5.44           | 5.22           | -4.90     | -4.03     |

**Table S1.** Torsion angle and HOMO/LUMO energy level

of model dimers for **P1- P4** calculated by DFT.

## OTFT Analysis

**Table S2.** Electrical parameters of field-effect transistors devices based on TV copolymers **P1-P4** fabricated with different chlorinated solvent.

| Materials | Solvent    | Annealing Temperature (°C) | $\mu_{Lin}$ (cm <sup>2</sup> /Vs) |               | $\mu_{Sat}$ (cm <sup>2</sup> /Vs) |               | $V_{th}$ (V) | $I_{On}/I_{off}$      |
|-----------|------------|----------------------------|-----------------------------------|---------------|-----------------------------------|---------------|--------------|-----------------------|
|           |            |                            | Max                               | Avg           | Max                               | Avg           | Avg          |                       |
| <b>P1</b> | CF         | 160                        | 0.0028                            | 0.0017        | 0.0036                            | 0.0021        | 25           | 10 <sup>3</sup>       |
|           | CB         |                            | 0.0095                            | 0.0069        | 0.013                             | 0.0073        | 30           | 10 <sup>3</sup>       |
|           | <b>DCB</b> |                            | <b>0.033</b>                      | <b>0.031</b>  | <b>0.055</b>                      | <b>0.038</b>  | <b>43</b>    | <b>10<sup>6</sup></b> |
| <b>P2</b> | CF         | 160                        | <10 <sup>-4</sup>                 |               | <10 <sup>-3</sup>                 |               |              |                       |
|           | CB         |                            | <10 <sup>-4</sup>                 |               | <10 <sup>-3</sup>                 |               |              |                       |
|           | <b>DCB</b> |                            | <b>0.0026</b>                     | <b>0.0021</b> | <b>0.0029</b>                     | <b>0.0028</b> | <b>61</b>    | <b>10<sup>6</sup></b> |
| <b>P3</b> | CF         | 160                        | 0.079                             | 0.053         | 0.29                              | 0.11          | 26           | 10 <sup>4</sup>       |
|           | CB         |                            | 0.055                             | 0.030         | 0.070                             | 0.048         | 41           | 10 <sup>4</sup>       |
|           | <b>DCB</b> |                            | <b>0.096</b>                      | <b>0.075</b>  | <b>0.36</b>                       | <b>0.17</b>   | <b>27</b>    | <b>10<sup>6</sup></b> |
| <b>P4</b> | <b>CF</b>  | 160                        | <b>0.134</b>                      | <b>0.052</b>  | <b>0.35</b>                       | <b>0.14</b>   | <b>23</b>    | <b>10<sup>4</sup></b> |
|           | CB         |                            | 0.077                             | 0.048         | 0.17                              | 0.081         | 20           | 10 <sup>4</sup>       |
|           | <b>DCB</b> |                            | <b>0.11</b>                       | <b>0.089</b>  | <b>0.34</b>                       | <b>0.15</b>   | <b>28</b>    | <b>10<sup>6</sup></b> |



**Table S3.** Electrical parameters of field-effect transistors devices based on TV copolymers **P1-P4** at

| Materials | Annealing Temperature (°C) | $\mu_{Lin}$ (cm <sup>2</sup> /Vs) |               | $\mu_{Sat}$ (cm <sup>2</sup> /Vs) |               | $V_{th}$ (V) | $I_{On}/I_{off}$      |
|-----------|----------------------------|-----------------------------------|---------------|-----------------------------------|---------------|--------------|-----------------------|
|           |                            | Max                               | Avg           | Max                               | Avg           | Avg          |                       |
| <b>P1</b> | Cast                       | 0.034                             | 0.029         | 0.041                             | 0.035         | 46           | 10 <sup>6</sup>       |
|           | 130                        | 0.043                             | 0.033         | 0.047                             | 0.043         | 45           | 10 <sup>6</sup>       |
|           | 160                        | 0.033                             | 0.031         | 0.055                             | 0.038         | 43           | 10 <sup>6</sup>       |
|           | 190                        | 0.039                             | 0.033         | 0.055                             | 0.044         | 41           | 10 <sup>7</sup>       |
|           | <b>220</b>                 | <b>0.060</b>                      | <b>0.049</b>  | <b>0.086</b>                      | <b>0.069</b>  | <b>43</b>    | <b>10<sup>6</sup></b> |
| <b>P2</b> | Cast                       | 0.00092                           | 0.00071       | 0.0015                            | 0.0014        | 62           | 10 <sup>5</sup>       |
|           | 160                        | 0.0026                            | 0.0021        | 0.0029                            | 0.0028        | 61           | 10 <sup>6</sup>       |
|           | <b>190</b>                 | <b>0.0022</b>                     | <b>0.0011</b> | <b>0.0033</b>                     | <b>0.0029</b> | <b>60</b>    | <b>10<sup>6</sup></b> |
| <b>P3</b> | Cast                       | 0.036                             | 0.032         | 0.073                             | 0.042         | 30           | 10 <sup>6</sup>       |
|           | 130                        | 0.047                             | 0.041         | 0.096                             | 0.062         | 30           | 10 <sup>7</sup>       |
|           | <b>160</b>                 | <b>0.096</b>                      | <b>0.075</b>  | <b>0.36</b>                       | <b>0.17</b>   | <b>27</b>    | <b>10<sup>6</sup></b> |
|           | 190                        | 0.077                             | 0.068         | 0.30                              | 0.14          | 32           | 10 <sup>7</sup>       |
|           | 220                        | 0.025                             | 0.021         | 0.047                             | 0.034         | 28           | 10 <sup>6</sup>       |
| <b>P4</b> | Cast                       | 0.038                             | 0.025         | 0.037                             | 0.028         | 30           | 10 <sup>6</sup>       |
|           | 130                        | 0.038                             | 0.032         | 0.088                             | 0.049         | 32           | 10 <sup>4</sup>       |
|           | <b>160</b>                 | <b>0.11</b>                       | <b>0.089</b>  | <b>0.34</b>                       | <b>0.15</b>   | <b>28</b>    | <b>10<sup>6</sup></b> |
|           | 190                        | 0.57                              | 0.049         | 0.16                              | 0.090         | 29           | 10 <sup>5</sup>       |
|           | 220                        | 0.039                             | 0.031         | 0.12                              | 0.06          | 28           | 10 <sup>4</sup>       |

different annealing temperatures.
